# Supplementary material
Source: publisher site journal article supplement (https://www.dovepress.com/article/181224)
Supplement: Supplementary file 1 [file get_supplementary_file.php]

## **Supplementary materials**

### **Methods**

#### **Calculation of costs and HCRU**

A cost of €24.13, which included official tariffs and surcharges, was applied to all general practitioner (GP) visits regardless of the year of visit. GP visit costs were sourced from the Dépenses Assurance Maladie Inter-Régimes [DAMIR] database consisting of monthly extractions of data from the larger French National Health Insurance (€24.13 in 2014)<sup>1</sup> and included official tariffs and surcharges. Chronic obstructive pulmonary disease treatment costs were sourced in one of two ways: for products currently on the market, 2015 costs were sourced from the Ministry of Health's public drug database;<sup>2</sup> for products no longer on the market, costs (at the time of removal) were acquired from the Social Security health insurance database.<sup>3</sup> In all instances, treatment costs were calculated by multiplying the product cost by the number of packs prescribed. No discounting or inflation adjustment was applied to the unit cost data. Dispensation fees have been applicable in France since January 1, 2015, and were therefore applied to the data for treatments prescribed from 2015 onwards only, without considering the number or duration of treatment lines received by a patient.

#### **REFERENCES**

1. Sherwood A, Maurel F, Colin X. Appraising The Cost Of Physician Visits And Technical Procedures In France In The Age Of Open Data. Paper presented at: ISPOR 18th Annual European Congress; 7-11 November 2015, 2015; Milan, Italy.
2. Ministère Des Affaires Sociales Et De La Santé. Base De Données Publique Des Médicaments. <http://base-donnees-publique.medicaments.gouv.fr/telechargement.php>. Accessed January 2018.
3. Sécurité Sociale: l'Assurance Maladie. Base des Médicaments et Informations Tarifaires. [http://www.codage.ext.cnamts.fr/codif/bdm\\_it/index.php?p\\_site=AMELI](http://www.codage.ext.cnamts.fr/codif/bdm_it/index.php?p_site=AMELI). Accessed January 2018.

**Table S1 ICD-10 codes for asthma and respiratory diseases potentially incompatible with COPD**

| ICD-10 codes | Detail                                                                                              |
|--------------|-----------------------------------------------------------------------------------------------------|
| J45.xx       | Asthma                                                                                              |
| A15.0        | Tuberculosis of lung <sup>a</sup> , confirmed by sputum microscopy with or without culture          |
| A15.1        | Tuberculosis of lung <sup>a</sup> , confirmed by culture only                                       |
| A15.2        | Tuberculosis of lung <sup>a</sup> , confirmed histologically                                        |
| A15.3        | Tuberculosis of lung <sup>a</sup> , confirmed by unspecified means                                  |
| A16.0        | Tuberculosis of lung <sup>a</sup> , bacteriologically and histologically negative                   |
| A16.1        | Tuberculosis of lung <sup>a</sup> , bacteriological and histological examination not done           |
| A16.2        | Tuberculosis of lung <sup>a</sup> , without mention of bacteriological or histological confirmation |
| E84.xx       | Cystic fibrosis                                                                                     |
| G47.35       | Congenital central alveolar hypoventilation syndrome                                                |
| J47.xx       | Bronchiectasis                                                                                      |
| J84.1        | Other interstitial pulmonary diseases with fibrosis                                                 |
| J84.0        | Alveolar and parietoalveolar conditions                                                             |
| J98.2        | Interstitial emphysema                                                                              |
| J98.3        | Compensatory emphysema                                                                              |
| J98.0        | Diseases of bronchus, not elsewhere classified                                                      |
| Q31.0        | Web of larynx                                                                                       |
| Q31.1        | Congenital subglottic stenosis                                                                      |
| Q31.3        | Laryngocele                                                                                         |
| Q31.8        | Other congenital malformations of larynx                                                            |
| Q32.1        | Other congenital malformations of trachea                                                           |
| Q32.4        | Other congenital malformations of bronchus                                                          |
| Q33.xx       | Congenital malformations of lung                                                                    |

<sup>a</sup>Tuberculosis: bronchiectasis, fibrosis of lung, pneumonia, pneumothorax. COPD, chronic obstructive pulmonary disease; ICD-10, International Classification of Disease, 10th Edition.

**Table S2 Factors potentially associated with initiation of different long-acting bronchodilator-based therapies in exploratory segmentation analysis**

| Cluster | Long-acting bronchodilator-based therapy | Variable                               | Sample | Frequency in the cluster (%) | p-value |
|---------|------------------------------------------|----------------------------------------|--------|------------------------------|---------|
| 1       | LAMA+LABA                                | Male gender                            | 133    | 72.3                         | 0.001   |
| 1       |                                          | 0 exacerbations pre-index              | 170    | 92.4                         | 0.014   |
| 2       | LAMA or LABA                             | COPD 0 days <sup>a</sup>               | 1,791  | 58.4                         | <0.001  |
| 2       |                                          | Age 50–<60 years                       | 832    | 27.1                         | <0.001  |
| 2       |                                          | Eosinophils tested - Yes               | 1,098  | 35.8                         | <0.001  |
| 2       |                                          | Neutrophils tested - Yes               | 1,106  | 36.0                         | 0.002   |
| 2       |                                          | Age <50 years                          | 462    | 15.1                         | 0.010   |
| 2       |                                          | Vascular comorbidities - Yes           | 293    | 9.5                          | 0.013   |
| 3       | LAMA+ICS or                              | COPD >0–500 days <sup>a</sup>          | 189    | 24.0                         | <0.001  |
| 3       | LAMA+LABA+ICS                            | Ischemic and cardiac comorbidity - Yes | 125    | 15.9                         | <0.001  |
| 3       |                                          | Age ≥70 years                          | 288    | 36.6                         | 0.013   |
| 4       | LABA+ICS                                 | COPD ≥500 days <sup>a</sup>            | 1,120  | 36.5                         | <0.001  |
| 4       |                                          | Female gender                          | 1,296  | 42.2                         | <0.001  |
| 4       |                                          | 1 moderate exacerbation pre-index      | 354    | 11.5                         | <0.001  |
| 4       |                                          | COPD symptoms - Yes                    | 1,362  | 44.4                         | <0.001  |
| 4       |                                          | ≥2 exacerbations pre-index             | 84     | 2.7                          | 0.012   |

<sup>a</sup>Duration from first recorded ICD-10 code for COPD to index date in days. COPD, chronic obstructive pulmonary disease; ICD-10, International Classification of Disease, 10th Edition; ICS, inhaled corticosteroid; LABA, long-acting  $\beta_2$ -agonist; LAMA, long-acting muscarinic antagonist.

**Table S3 Exploratory logistic regression model comparing initiation of a particular COPD maintenance therapy over another**

| <b>Variable</b>                                                              | <b>OR</b>            | <b>95% CI</b> | <b>p-value</b> |
|------------------------------------------------------------------------------|----------------------|---------------|----------------|
| <b>LABA (ref. LAMA)</b>                                                      |                      |               |                |
| Abnormal sputum (ref: No)                                                    | 0.24                 | 0.07–0.81     | 0.02           |
| Age                                                                          | 1.00                 | 0.99–1.01     | NS             |
| Atopy (ref: No)                                                              | <0.001               | <0.001        | NS             |
| Time interval between first recorded COPD ICD-10 code and index date (years) | 1.00                 | 0.97–1.03     | NS             |
| Cardiovascular comorbidities (ref: No)                                       | 0.97                 | 0.71–1.33     | NS             |
| Cough (R05) (ref: No)                                                        | 1.16                 | 0.96–1.41     | NS             |
| Diabetes (ref: No)                                                           | 1.45                 | 1.12–1.89     | 0.005          |
| Fatigue (ref: No)                                                            | 1.01                 | 0.77–1.33     | NS             |
| GERD (ref: No)                                                               | 0.98                 | 0.76–1.27     | NS             |
| Gender (ref: Male)                                                           | 1.03                 | 0.86–1.25     | NS             |
| Ischemic and/or cardiac comorbidities (ref: No)                              | 0.71                 | 0.52–0.96     | 0.03           |
| Number of exacerbation                                                       | 1.17                 | 0.96–1.43     | NS             |
| Shortness of breath (ref: No)                                                | 1.63                 | 1.22–2.16     | 0.0008         |
| Wheezing (ref: No)                                                           | >999.99 <sup>a</sup> | <0.001        | NS             |
| <b>LABA+ICS (ref. LAMA)</b>                                                  |                      |               |                |
| Abnormal sputum (ref: No)                                                    | 0.79                 | 0.43–1.44     | NS             |
| Age                                                                          | 1.01                 | 1.00–1.01     | 0.01           |
| Atopy (ref: No)                                                              | 2.25                 | 0.25–20.34    | NS             |
| Time interval between first recorded COPD ICD-10 code and index date (years) | 1.08                 | 1.06–1.10     | <0.0001        |
| Cardiovascular comorbidities (ref: No)                                       | 0.80                 | 0.62–1.02     | NS             |
| Cough (R05) (ref: No)                                                        | 1.30                 | 1.12–1.50     | 0.0006         |
| Diabetes (ref: No)                                                           | 1.16                 | 0.95–1.43     | NS             |
| Fatigue (ref: No)                                                            | 0.97                 | 0.79–1.20     | NS             |
| GERD (ref: No)                                                               | 0.79                 | 0.65–0.96     | 0.02           |
| Gender (ref: Male)                                                           | 1.24                 | 1.08–1.43     | 0.002          |
| Ischemic and/or cardiac comorbidities (ref: No)                              | 1.00                 | 0.80–1.24     | NS             |
| Number of exacerbations                                                      | 1.31                 | 1.13–1.52     | 0.0004         |
| Shortness of breath (ref: No)                                                | 0.94                 | 0.73–1.19     | NS             |

| <b>Triple therapy (ref. dual therapy)<sup>b</sup></b>                        |      |           |         |
|------------------------------------------------------------------------------|------|-----------|---------|
| Abnormal sputum (ref: No)                                                    | 0.40 | 0.18–0.88 | 0.02    |
| Age                                                                          | 1.00 | 0.99–1.01 | NS      |
| Atopy (ref: No)                                                              | 0.58 | 0.06–5.41 | NS      |
| Cardiovascular comorbidities (ref: No)                                       | 1.16 | 0.78–1.72 | NS      |
| Cough (R05) (ref: No)                                                        | 1.55 | 1.20–1.99 | 0.0006  |
| Diabetes (ref: No)                                                           | 1.26 | 0.91–1.74 | NS      |
| Time interval between first recorded COPD ICD-10 code and index date (years) | 1.05 | 1.01–1.08 | 0.007   |
| Fatigue (ref: No)                                                            | 1.63 | 1.08–2.45 | 0.02    |
| GERD (ref: No)                                                               | 0.91 | 0.66–1.25 | NS      |
| Gender (ref: Male)                                                           | 1.68 | 1.33–2.12 | <0.0001 |
| Ischemic and/or cardiac comorbidities (ref: No)                              | 0.73 | 0.54–0.98 | 0.04    |
| Number of exacerbations                                                      | 1.24 | 0.96–1.60 | NS      |
| Shortness of breath (ref: No)                                                | 0.60 | 0.43–0.83 | 0.002   |

<sup>a</sup>The OR for wheezing is very large owing to low numbers of patients experiencing this symptom; <sup>b</sup>triple therapy: LAMA+LABA+ICS, dual therapy: LAMA+LABA, LAMA+ICS or LABA+ICS. CI, confidence interval; COPD, chronic obstructive pulmonary disease; GERD, gastroesophageal reflux disease; ICD-10, International Classification of Disease, 10th Edition; ICS, inhaled corticosteroid; LABA, long-acting  $\beta_2$ -agonist; LAMA, long-acting muscarinic antagonist; NS, non-significant; OR, odds ratio
